# Supplementary material for: Innovative Virtual Reality (VR) Application for Preventing of Falls among Chinese Older Adults: A Usability and Acceptance Exploratory Study
Source: Hindawi journal article supplement (doi:10.1155/2024/5556767), 2024-03-19
Supplement: f1 [file 5556767.f1.zip]

Archive with 5 entries (5 files):
- Additional file 1. VirCube VR Game Training Program (2021 version).pdf
- Appendix 1. VR Usability Questionnaire (HK-version).pdf
- video clip 1.mp4
- video clip 2.mp4
- video clip 3.mp4
