# Supplementary material for: Innovative Virtual Reality (VR) Application for Preventing of Falls among Chinese Older Adults: A Usability and Acceptance Exploratory Study
Source: Hindawi journal article supplement (doi:10.1155/2024/5556767), 2024-03-19
Supplement: f1 [file 5556767.f1.zip › Additional file 1. VirCube VR Game Training Program (2021 version).pdf]

**Additional file 1: VirCube VR Game Training Program (2021 version)**

**VR Game 1: Jogging exercise**

Purpose: Physical balance and safe walking training

Grading: 3 levels (Level 1-by hand trackers; Level 2- by hand trackers & obstacle; Level 3- by hand/foot trackers & obstacles)

Device: 3D stereoscopic eyewear, hand, and foot trackers

**VR game- Jogging exercise**

**Jogging in the park**

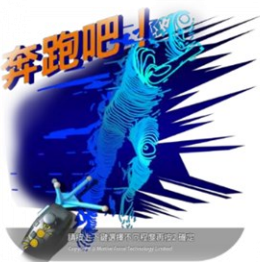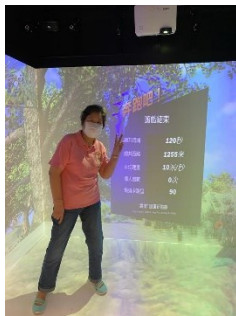

**Sequencing & Grading:**

1. Participant uses hand trackers & selects a level of activity
2. Participant runs with arms movement and keeps on a running path (upper limb balance)
3. Participant runs with upper and lower limbs trackers and follows a running path (whole body balance & physical training)
4. Participant runs and avoids hitting any obstacle on a running path (advanced physical balance and coordination skill)
5. Participant runs faster and overcomes more obstacles (physical and

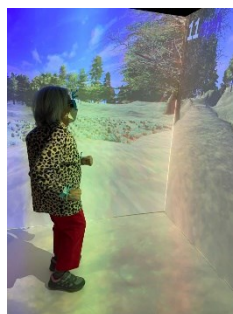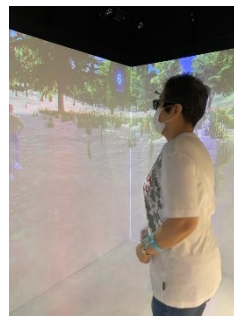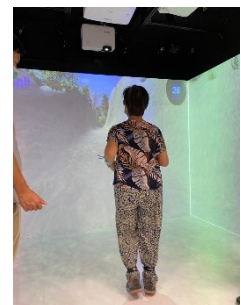

cognitive training)

VR demon (see video clip)

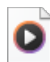

video clip 1.mp4

## VR Game 2: Fire Drill

Purpose: Cognitive training - executive function (Problem-solving skill)

Grading: N/A

Device: 3D stereoscopic eyewear, hand controller, hand trackers

### VR game – Fire drill

|                                                                                                                                                                                                                                                                                                                                                                                            |                                                                                                                                                                                                                                                                                                                                                                                                                                                                                                                                                                                                                                                                                                                                                                                                                                                                                                                                                                                                                                                                                                                                                                                                                                                                                                                                                                                                                                                                                                                                                                                       |
|--------------------------------------------------------------------------------------------------------------------------------------------------------------------------------------------------------------------------------------------------------------------------------------------------------------------------------------------------------------------------------------------|---------------------------------------------------------------------------------------------------------------------------------------------------------------------------------------------------------------------------------------------------------------------------------------------------------------------------------------------------------------------------------------------------------------------------------------------------------------------------------------------------------------------------------------------------------------------------------------------------------------------------------------------------------------------------------------------------------------------------------------------------------------------------------------------------------------------------------------------------------------------------------------------------------------------------------------------------------------------------------------------------------------------------------------------------------------------------------------------------------------------------------------------------------------------------------------------------------------------------------------------------------------------------------------------------------------------------------------------------------------------------------------------------------------------------------------------------------------------------------------------------------------------------------------------------------------------------------------|
| <p>Fire drill exercise</p> 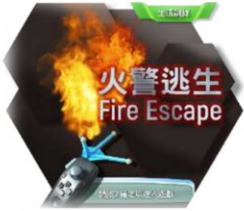 The logo for the 'Fire Escape' VR game. It features a stylized fire flame in orange and yellow. Below the flame, the Chinese characters '火警逃生' (Fire Alarm Escape) are written in red, followed by 'Fire Escape' in white. The background is dark with some geometric shapes. | <p>Sequencing:</p> <ol style="list-style-type: none"><li>1. When fire alarm on, participant moves tracker to point out and touch three important things (key, mobile &amp; wet towel) for evacuation.</li><li>2. Participant walks to the front door and uses tracker to unlock the door (balance and hand-eye coordination)</li><li>3. Participant uses tracker to select different escape routes (judgement)</li><li>4. Participant chooses either route 1(lift) or route 2(up/downstairs) to get out of fire scene safely (decision making)</li></ol> <div data-bbox="614 896 855 1077">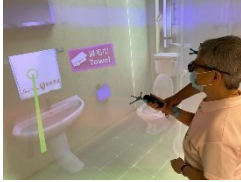A participant wearing VR glasses and a hand tracker is in a virtual environment. They are standing in a room with a sink and a mirror. A green line is projected on the wall, indicating a path or object.</div> <div data-bbox="866 896 1118 1077">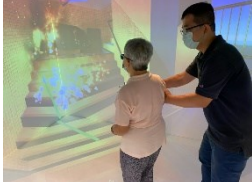A participant wearing VR glasses and a hand tracker is in a virtual environment. They are standing in a room with a fire alarm and a door. A green line is projected on the wall, indicating a path or object.</div> <div data-bbox="1145 896 1402 1077">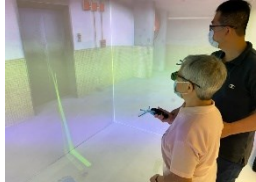A participant wearing VR glasses and a hand tracker is in a virtual environment. They are standing in a room with a fire alarm and a door. A green line is projected on the wall, indicating a path or object.</div> |
|--------------------------------------------------------------------------------------------------------------------------------------------------------------------------------------------------------------------------------------------------------------------------------------------------------------------------------------------------------------------------------------------|---------------------------------------------------------------------------------------------------------------------------------------------------------------------------------------------------------------------------------------------------------------------------------------------------------------------------------------------------------------------------------------------------------------------------------------------------------------------------------------------------------------------------------------------------------------------------------------------------------------------------------------------------------------------------------------------------------------------------------------------------------------------------------------------------------------------------------------------------------------------------------------------------------------------------------------------------------------------------------------------------------------------------------------------------------------------------------------------------------------------------------------------------------------------------------------------------------------------------------------------------------------------------------------------------------------------------------------------------------------------------------------------------------------------------------------------------------------------------------------------------------------------------------------------------------------------------------------|

### VR Game 3: Community Living Skill Practice

Purpose: Cognitive training – executive function (classification & calculation)

Grading: 3 levels (Level 1- free choice; Level 2: shopping items- 2-3; Level 3: shopping items- 3-5)

Device: 3D stereoscopic eyewear, hand controller

#### VR game- community living skill

|                                                                                                               |                                                                                                                                                                                                                                                                                                                                                                                                                                                                                                                                                                                                                                                                                                                                                |
|---------------------------------------------------------------------------------------------------------------|------------------------------------------------------------------------------------------------------------------------------------------------------------------------------------------------------------------------------------------------------------------------------------------------------------------------------------------------------------------------------------------------------------------------------------------------------------------------------------------------------------------------------------------------------------------------------------------------------------------------------------------------------------------------------------------------------------------------------------------------|
| <p>Shopping orientation</p> 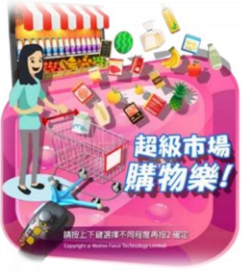 | <p>Sequencing &amp; Grading:</p> <ol style="list-style-type: none"><li>1. Participant uses hand controller &amp; selects a level of activity</li><li>2. Participant remembers a shopping list (memory skill)</li><li>3. Participant goes to the selected shopping regions (making decision)</li><li>4. Participant chooses and picks up the correct no. of items (classification &amp; counting)</li><li>5. Participant checks and goes to cashier for payment (calculation)</li></ol> <div data-bbox="667 891 938 1093">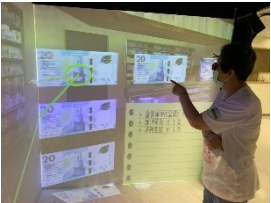</div> <div data-bbox="986 891 1189 1137">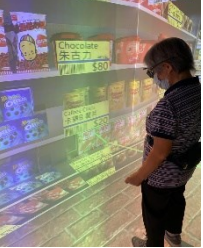</div> |
|---------------------------------------------------------------------------------------------------------------|------------------------------------------------------------------------------------------------------------------------------------------------------------------------------------------------------------------------------------------------------------------------------------------------------------------------------------------------------------------------------------------------------------------------------------------------------------------------------------------------------------------------------------------------------------------------------------------------------------------------------------------------------------------------------------------------------------------------------------------------|

#### VR Game 4: Balance & sport exercises

Purpose: Cognitive-motor training and advanced balance exercise

Grading: 4 levels:

Level 1- defender (keeping); Level 2-attacker (attacking); Level 3- penalty kick (attacking);

Level 4- penalty kick (goalkeeping)-

Device: 3D stereoscopic eyewear, hand controller, hand, and foot trackers

#### VR game- balance & sport exercise

##### Soccer exercise

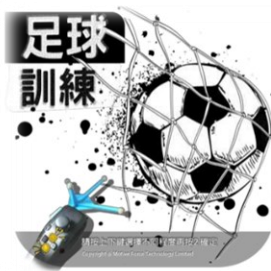

##### Sequencing & Grading:

1. Participant uses hand controller & selects a level of activity
2. Participant wears hand and foot trackers, practices passing a soccer to other player (balance & stability)
3. Participant runs and kicks a soccer ball to different position (balancing & weight shifting training)
4. Participant kicks a soccer ball to goalkeeper repeatedly (balancing, stability, weight-shift training to prevent falling)
5. Participant as a goalkeeper uses hand and foot trackers to defend the attacker (advanced limbs balancing and coordination, ball tracking exercise, spatial orientation & higher executive function skill)

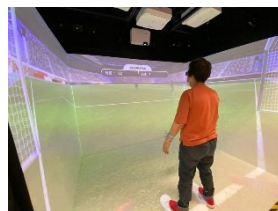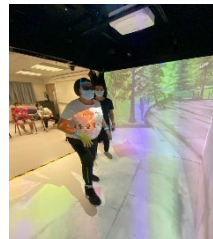

VR demon (see video clips)

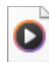

video clip 2.mp4

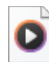

video clip 3.mp4
